# Supplementary material
Source: PubMed Central journal article supplement (PMC3547197)
Supplement: npp2012203x3.pdf [file npp2012203x3.pdf]

Supplementary table 1. ACC absolute metabolites values by Bcl-2 genotype.

| Metabolite | genotype | Healthy controls |                | Bipolar I Disorder |                |
|------------|----------|------------------|----------------|--------------------|----------------|
|            |          | Mean             | Std. Deviation | Mean               | Std. Deviation |
| Glu        | AG       | 7.74             | 0.92           | 7.70               | 0.91           |
|            | GG       | 7.98             | 0.77           | 8.19               | 0.71           |
|            | AA       | 7.42             | 1.72           | 9.29               | 1.11           |
|            | Total    | 7.82             | 0.94           | 8.11               | 1.01           |
| Myo        | AG       | 5.44             | 0.74           | 4.83               | 0.66           |
|            | GG       | 5.49             | 0.69           | 5.21               | 0.67           |
|            | AA       | 4.70             | 0.63           | 4.99               | 0.75           |
|            | Total    | 5.39             | 0.73           | 4.99               | 0.68           |
| NAA        | AG       | 9.64             | 0.77           | 8.70               | 1.34           |
|            | GG       | 9.76             | 0.62           | 9.21               | 1.15           |
|            | AA       | 9.27             | 0.38           | 7.74               | 1.57           |
|            | Total    | 9.66             | 0.67           | 8.74               | 1.36           |
| Cre        | AG       | 7.55             | 0.87           | 6.91               | 1.27           |
|            | GG       | 7.64             | 0.62           | 7.73               | 1.71           |
|            | AA       | 7.24             | 0.52           | 6.67               | 2.40           |
|            | Total    | 7.56             | 0.73           | 7.16               | 1.64           |
| Cho        | AG       | 1.64             | 0.21           | 1.79               | 1.10           |
|            | GG       | 1.75             | 0.29           | 3.00               | 2.63           |
|            | AA       | 1.49             | 0.09           | 2.43               | 2.87           |
|            | Total    | 1.67             | 0.25           | 2.31               | 2.07           |
| Glx        | AG       | 8.17             | 1.07           | 8.46               | 1.28           |
|            | GG       | 8.38             | 0.94           | 8.79               | 0.87           |
|            | AA       | 7.85             | 2.14           | 10.59              | 1.62           |
|            | Total    | 8.23             | 1.12           | 8.90               | 1.39           |
| Glx/Glu    | AG       | 1.05             | 0.05           | 1.10               | 0.07           |
|            | GG       | 1.05             | 0.05           | 1.07               | 0.05           |
|            | AA       | 1.05             | 0.05           | 1.14               | 0.09           |
|            | Total    | 1.05             | 0.05           | 1.09               | 0.07           |

caption: Glu= glutamate; Myo= myo-inositol; NAA= N-acetylaspartate;  
 Cre=creatine phosphocreatine; Cho= choline compounds; Glx=  
 glutamate+glutamine. significance level p<0.05
