# Supplementary material
Source: PubMed Central journal article supplement (PMC3547197)
Supplement: npp2012203x4.pdf [file npp2012203x4.pdf]

Supplementary Table 2. Multivariate analysis of covariance using magnetic resonance spectroscopy absolute metabolites values in the anterior cingulate as dependent variables and age, gender, group, Bcl-2 genotype, group\*Bcl-2 genotype interaction as covariates.

| Covariate     | Dependent Variable | df | Mean Square | F     | Sig.         | Partial Eta Squared | Observed Power |
|---------------|--------------------|----|-------------|-------|--------------|---------------------|----------------|
| age           | Glu                | 1  | 0.11        | 0.15  | 0.701        | 0.2%                | 6.7%           |
|               | Myo                | 1  | 1.44        | 3.15  | 0.080        | 4.2%                | 41.7%          |
|               | NAA                | 1  | 2.25        | 2.10  | 0.152        | 2.8%                | 29.8%          |
|               | Cre                | 1  | 5.82        | 3.89  | 0.053        | 5.1%                | 49.4%          |
|               | Cho                | 1  | 0.95        | 0.45  | 0.506        | 0.6%                | 10.1%          |
|               | Glx                | 1  | 0.06        | 0.05  | 0.826        | 0.1%                | 5.5%           |
| gender        | Glx/Glu            | 1  | 0.01        | 1.98  | 0.164        | 2.7%                | 28.4%          |
|               | Glu                | 1  | 7.40        | 9.79  | <b>0.003</b> | 12.0%               | 87.0%          |
|               | Myo                | 1  | 1.41        | 3.07  | 0.084        | 4.1%                | 40.9%          |
|               | NAA                | 1  | 1.71        | 1.60  | 0.211        | 2.2%                | 23.8%          |
|               | Cre                | 1  | 6.11        | 4.08  | <b>0.047</b> | 5.4%                | 51.4%          |
|               | Cho                | 1  | 2.62        | 1.23  | 0.272        | 1.7%                | 19.4%          |
| group         | Glx                | 1  | 6.31        | 4.76  | <b>0.032</b> | 6.2%                | 57.6%          |
|               | Glx/Glu            | 1  | 0.00        | 0.91  | 0.343        | 1.2%                | 15.6%          |
|               | Glu                | 1  | 4.51        | 5.97  | <b>0.017</b> | 7.7%                | 67.4%          |
|               | Myo                | 1  | 0.50        | 1.10  | 0.299        | 1.5%                | 17.8%          |
|               | NAA                | 1  | 13.27       | 12.38 | <b>0.001</b> | 14.7%               | 93.5%          |
|               | Cre                | 1  | 1.86        | 1.24  | 0.269        | 1.7%                | 19.6%          |
| Bcl-2         | Cho                | 1  | 7.65        | 3.59  | 0.062        | 4.7%                | 46.4%          |
|               | Glx                | 1  | 14.26       | 10.75 | <b>0.002</b> | 13.0%               | 89.9%          |
|               | Glx/Glu            | 1  | 0.03        | 9.95  | <b>0.002</b> | 12.1%               | 87.5%          |
|               | Glu                | 2  | 1.26        | 1.67  | 0.196        | 4.4%                | 34.0%          |
|               | Myo                | 2  | 1.23        | 2.69  | 0.075        | 6.9%                | 51.7%          |
|               | NAA                | 2  | 0.60        | 0.56  | 0.573        | 1.5%                | 14.0%          |
| Bcl-2 * group | Cre                | 2  | 0.63        | 0.42  | 0.658        | 1.2%                | 11.6%          |
|               | Cho                | 2  | 0.34        | 0.16  | 0.855        | 0.4%                | 7.3%           |
|               | Glx                | 2  | 1.07        | 0.80  | 0.452        | 2.2%                | 18.2%          |
|               | Glx/Glu            | 2  | 0.00        | 0.09  | 0.913        | 0.3%                | 6.3%           |
|               | Glu                | 2  | 3.29        | 4.35  | <b>0.016</b> | 10.8%               | 73.7%          |
|               | Myo                | 2  | 0.61        | 1.33  | 0.271        | 3.6%                | 27.8%          |
|               | NAA                | 2  | 0.91        | 0.85  | 0.431        | 2.3%                | 19.1%          |
|               | Cre                | 2  | 0.71        | 0.47  | 0.626        | 1.3%                | 12.4%          |
|               | Cho                | 2  | 1.77        | 0.83  | 0.441        | 2.2%                | 18.7%          |
|               | Glx                | 2  | 6.14        | 4.63  | <b>0.013</b> | 11.4%               | 76.5%          |
|               | Glx/Glu            | 2  | 0.004       | 1.24  | 0.295        | 3.3%                | 26.2%          |

caption: Glu= glutamate; Myo= myo-inositol; NAA= N-acetylaspartate; Cre=creatine phosphocreatine; Cho= choline compounds; Glx= glutamate+glutamine. significance level p<0.05
