# Supplementary material
Source: PubMed Central journal article supplement (PMC3547197)
Supplement: npp2012203x5.pdf [file npp2012203x5.pdf]

Supplementary table 3. Parameter estimates of multivariate analysis of covariance using magnetic resonance spectroscopy absolute metabolites values in the anterior cingulate as dependent variables and age, gender, group, Bcl-2 genotype, group\*Bcl-2 genotype interaction as covariates.

| Dependent Variable | Parameter                 | B              | Std. Error | t      | Sig.         | Partial Eta Squared | Observed Power |
|--------------------|---------------------------|----------------|------------|--------|--------------|---------------------|----------------|
| Glu                | age                       | -0.007         | 0.017      | -0.386 | 0.701        | 0.2%                | 6.7%           |
|                    | gender                    | 0.665          | 0.213      | 3.129  | <b>0.003</b> | 12.0%               | 87.0%          |
|                    | Group                     | 1.76           | 0.562      | 3.131  | <b>0.003</b> | 12.0%               | 87.1%          |
|                    | Bcl-2 genotype (AG)       | 0.225          | 0.482      | 0.467  | 0.642        | 0.3%                | 7.5%           |
|                    | Bcl-2 genotype (GG)       | 0.683          | 0.483      | 1.414  | 0.162        | 2.7%                | 28.7%          |
|                    | Bcl-2 genotype (AA)       | 0 <sup>a</sup> | .          | .      | .            | .                   | .              |
|                    | Group*Bcl-2 genotype (AG) | -1.713         | 0.632      | -2.713 | <b>0.008</b> | 9.3%                | 76.3%          |
|                    | Group*Bcl-2 genotype (GG) | -1.824         | 0.646      | -2.826 | <b>0.006</b> | 10.0%               | 79.6%          |
|                    | Group*Bcl-2 genotype (AA) | 0 <sup>a</sup> | .          | .      | .            | .                   | .              |
| Glx                | age                       | 0.005          | 0.023      | 0.22   | 0.826        | 0.1%                | 5.5%           |
|                    | gender                    | 0.615          | 0.282      | 2.181  | <b>0.032</b> | 6.2%                | 57.6%          |
|                    | Group                     | 2.637          | 0.745      | 3.54   | <b>0.001</b> | 14.8%               | 93.7%          |
|                    | Bcl-2 genotype (AG)       | 0.208          | 0.639      | 0.325  | 0.746        | 0.1%                | 6.2%           |
|                    | Bcl-2 genotype (GG)       | 0.628          | 0.64       | 0.982  | 0.329        | 1.3%                | 16.3%          |
|                    | Bcl-2 genotype (AA)       | 0 <sup>a</sup> | .          | .      | .            | .                   | .              |
|                    | Group*Bcl-2 genotype (AG) | -2.281         | 0.837      | -2.726 | <b>0.008</b> | 9.4%                | 76.7%          |
|                    | Group*Bcl-2 genotype (GG) | -2.532         | 0.855      | -2.96  | <b>0.004</b> | 10.8%               | 83.1%          |
|                    | Group*Bcl-2 genotype (AA) | 0 <sup>a</sup> | .          | .      | .            | .                   | .              |

<sup>a</sup>This parameter is set to zero because it is redundant.

caption: Glu= glutamate; Cre=creatine phosphocreatine; Glx= glutamate+glutamine. significance level p<0.05
